# Supplementary material
Source: PubMed Central journal article supplement (PMC2994586)
Supplement: NIHMS252194-supplement-supp_info_1.pdf [file NIHMS252194-supplement-supp_info_1.pdf]

**Supporting Information 1 for the manuscript:**

“Metal-Assisted and Microwave-Accelerated Evaporative Crystallization” by Pinard and Aslan.

Corresponding author e-mail: [kadir.aslan@morgan.edu](mailto:kadir.aslan@morgan.edu)

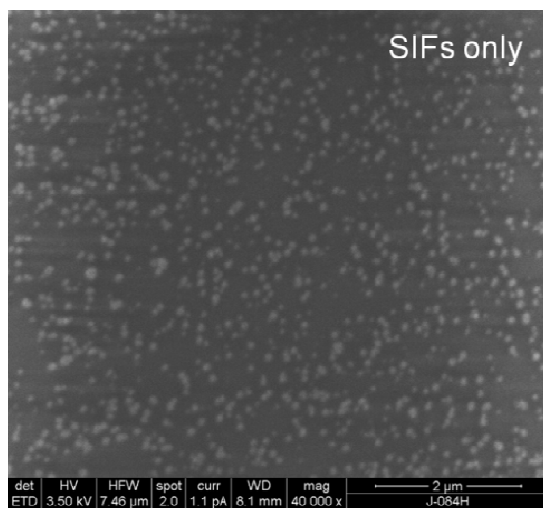

**Figure S1.** SEM image of Silver Island Films (SIFs) on blank glass slides. SIFs are ~80 nm in diameter.

**Glass, RT, 3.2 M, pH= 6**

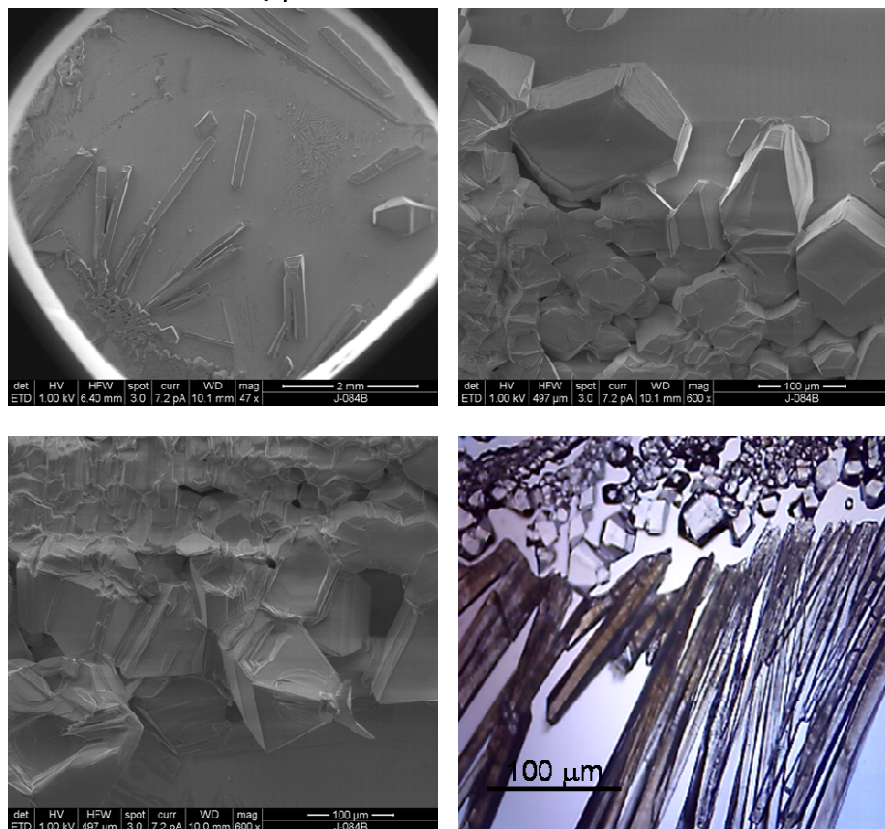

**Figure S2.** SEM and optical images of glycine crystals grown from 3.2 M pH=6 aqueous glycine solution on blank glass slides at room temperature (RT).

**Glass, MW, 3.2 M, pH= 6**

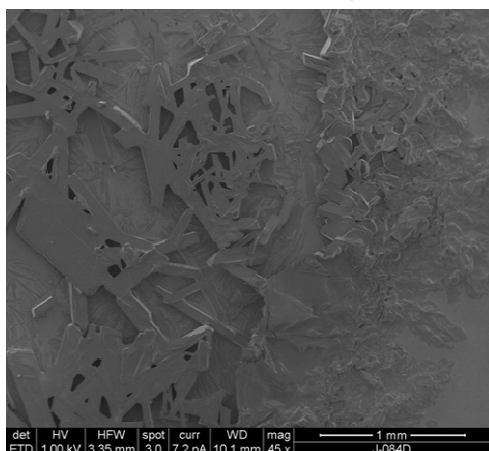

**Glass, MW, 1.6 M, pH= 6**

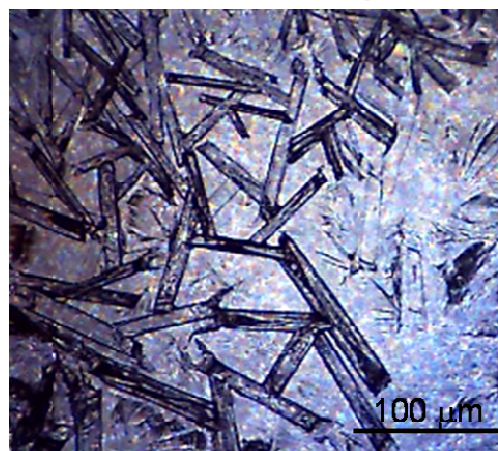

**Glass, MW, 1.6 M, pH= 9**

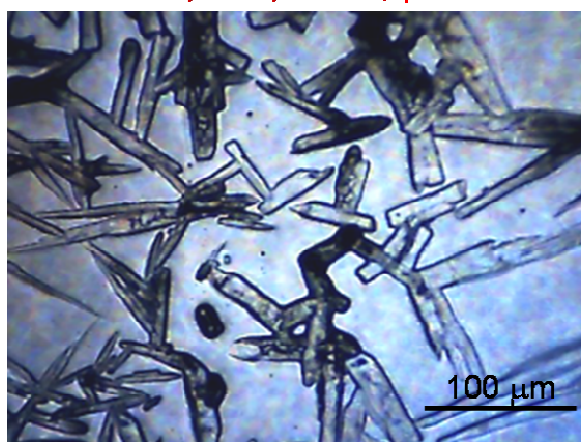

**Figure S3.** SEM and optical images of glycine crystals grown from various aqueous glycine solutions on blank glass slides using microwave heating (MW).

SIFs, RT, 3.2 M, pH= 6

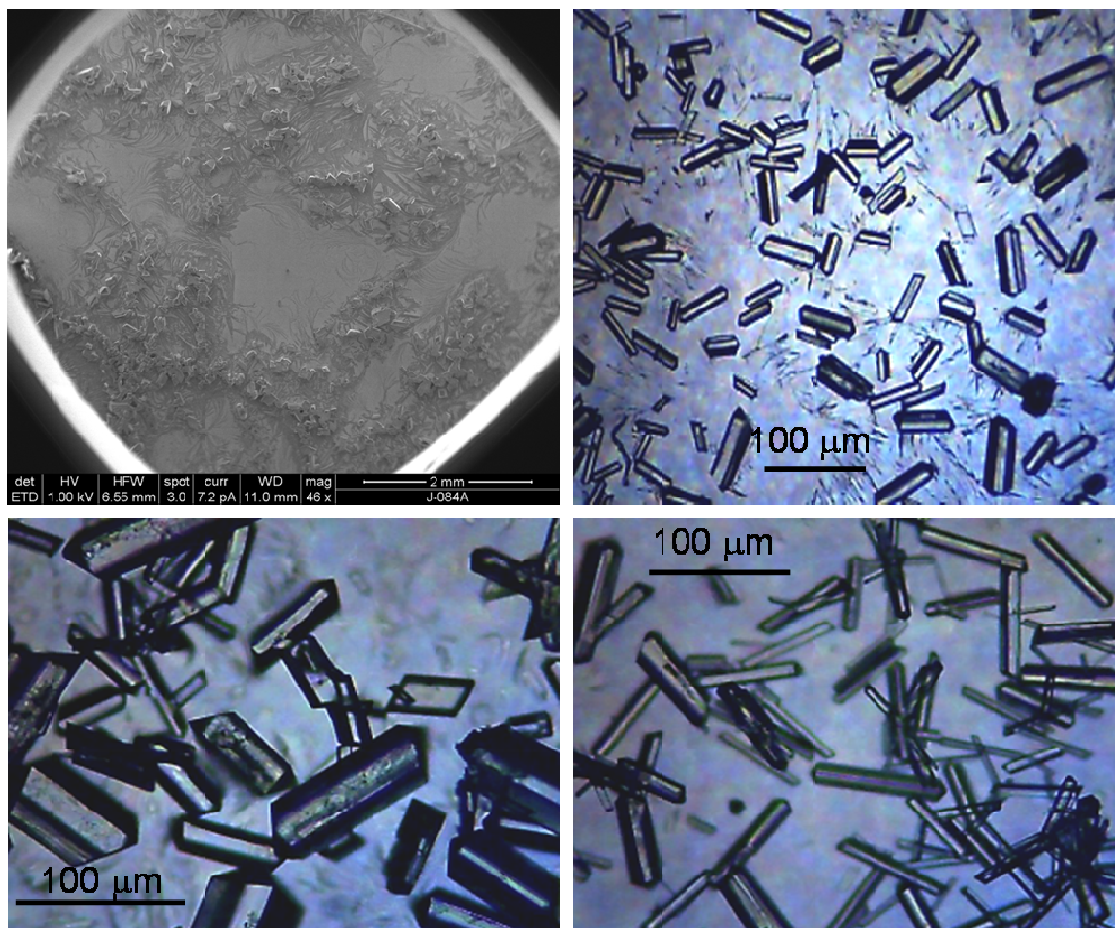

**Figure S4.** SEM and optical images of glycine crystals grown from 3.2 M pH=6 aqueous glycine solution on SIFs at room temperature (RT).

SIFs, RT, 3.2 M, pH= 4

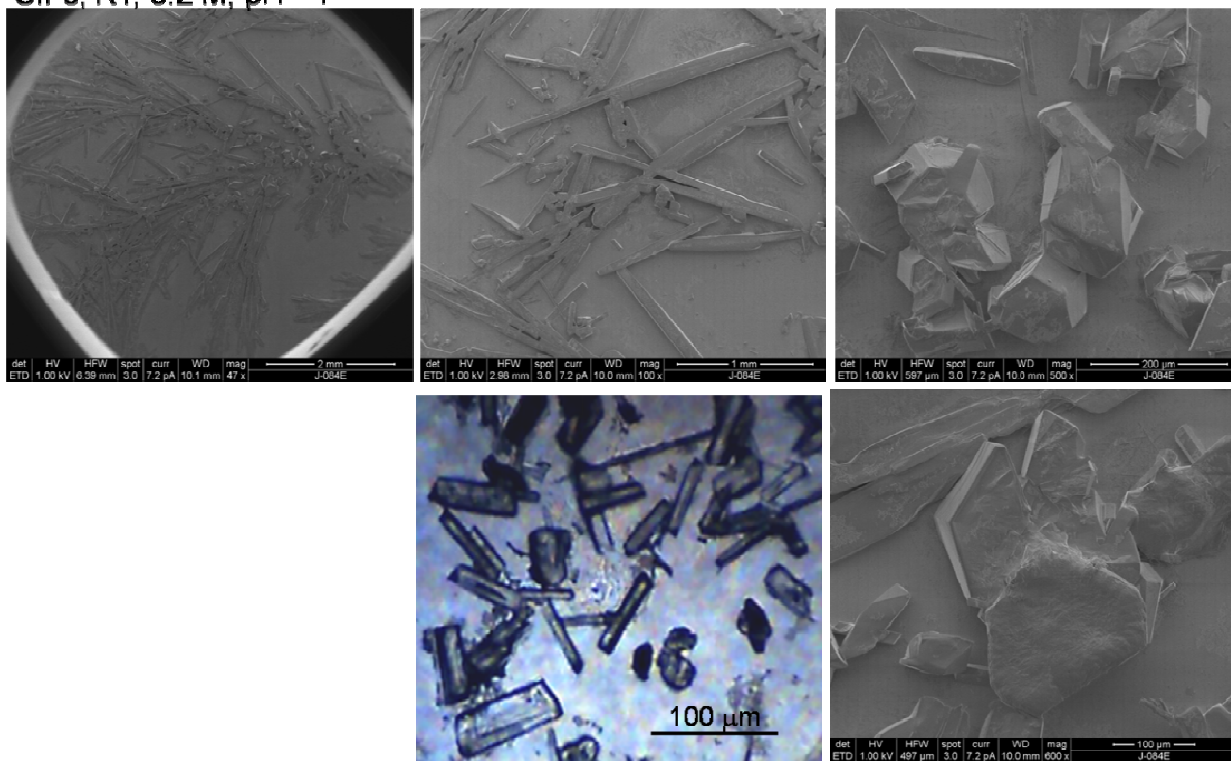

**Figure S5.** SEM and optical images of glycine crystals grown from 3.2 M pH= 4 aqueous glycine solution on SIFs at room temperature (RT).

**SIFs, RT, 1.6 M, pH= 4**

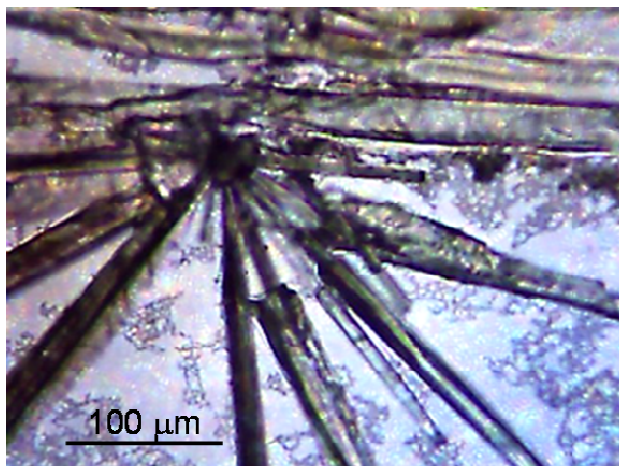

**SIFs, RT, 1.6 M, pH= 6**

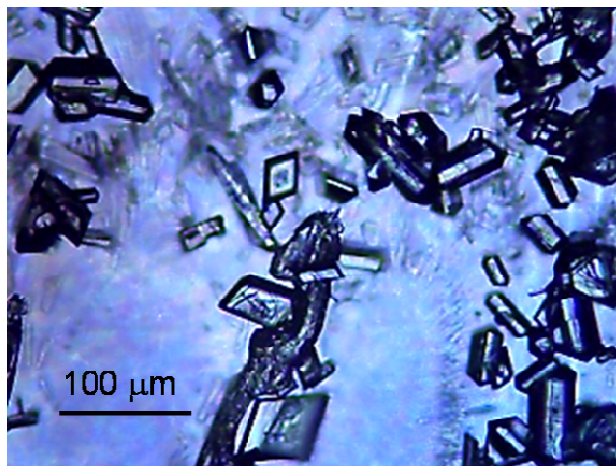

**SIFs, RT, 1.6 M, pH= 9**

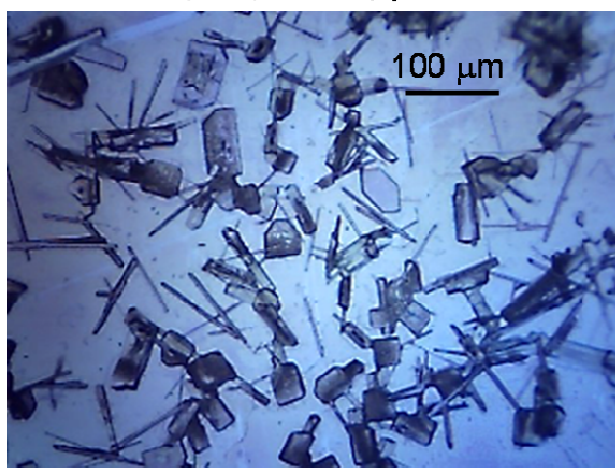

**Figure S6.** Optical microscope images of glycine crystals grown from various aqueous glycine solutions on SIFs at room temperature (RT).

**SIFs, MW, 3.2 M, pH= 4**

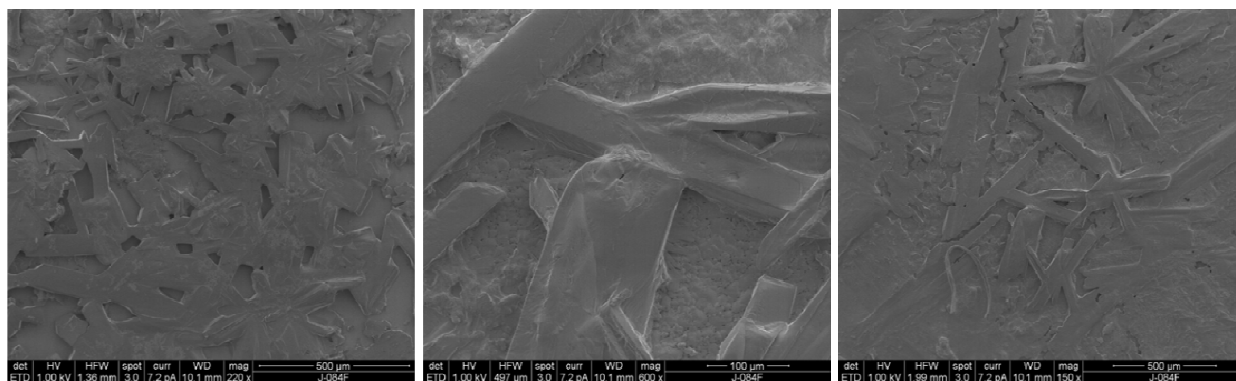

**Figure S7.** SEM images of glycine crystals grown from 3.2M pH=4 aqueous glycine solution on SIFs using microwave heating (MW).

**SIFs, MW, 3.2 M, pH= 6**

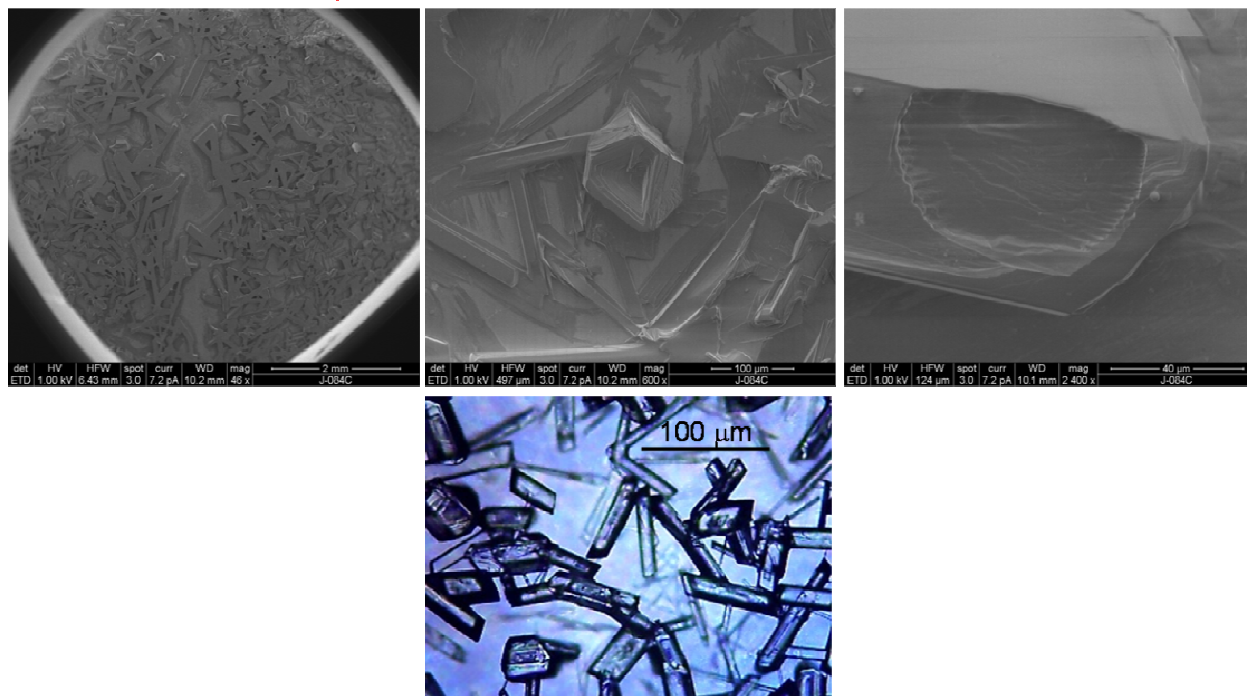

**Figure S8.** SEM and optical images of glycine crystals grown from 3.2M pH=6 aqueous glycine solution on SIFs using microwave heating (MW).

**SIFs, MW, 1.6 M, pH= 6**

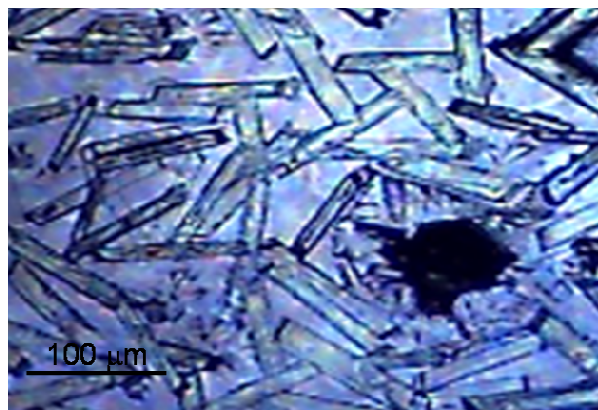

**SIFs, MW, 4 M, pH= 9**

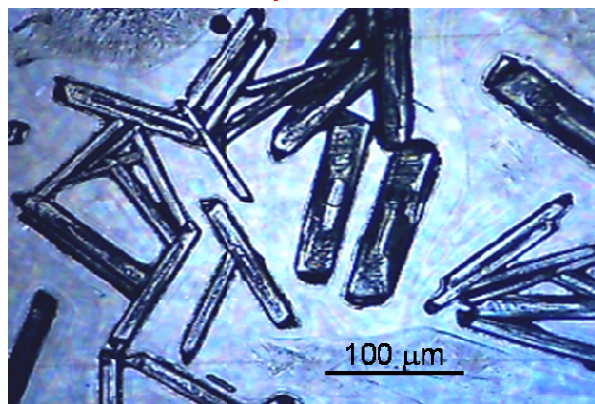

**Figure S9.** Optical microscope images of glycine crystals grown from various aqueous glycine solutions on SIFs using microwave heating (MW).
